# Supplementary material for: Integrated analysis of DNA copy number and gene expression microarray data using gene sets
Source: PubMed Central journal article supplement (PMC2753845; doi:10.1186/1471-2105-10-203), 2009-06-29

# Significantly associated features

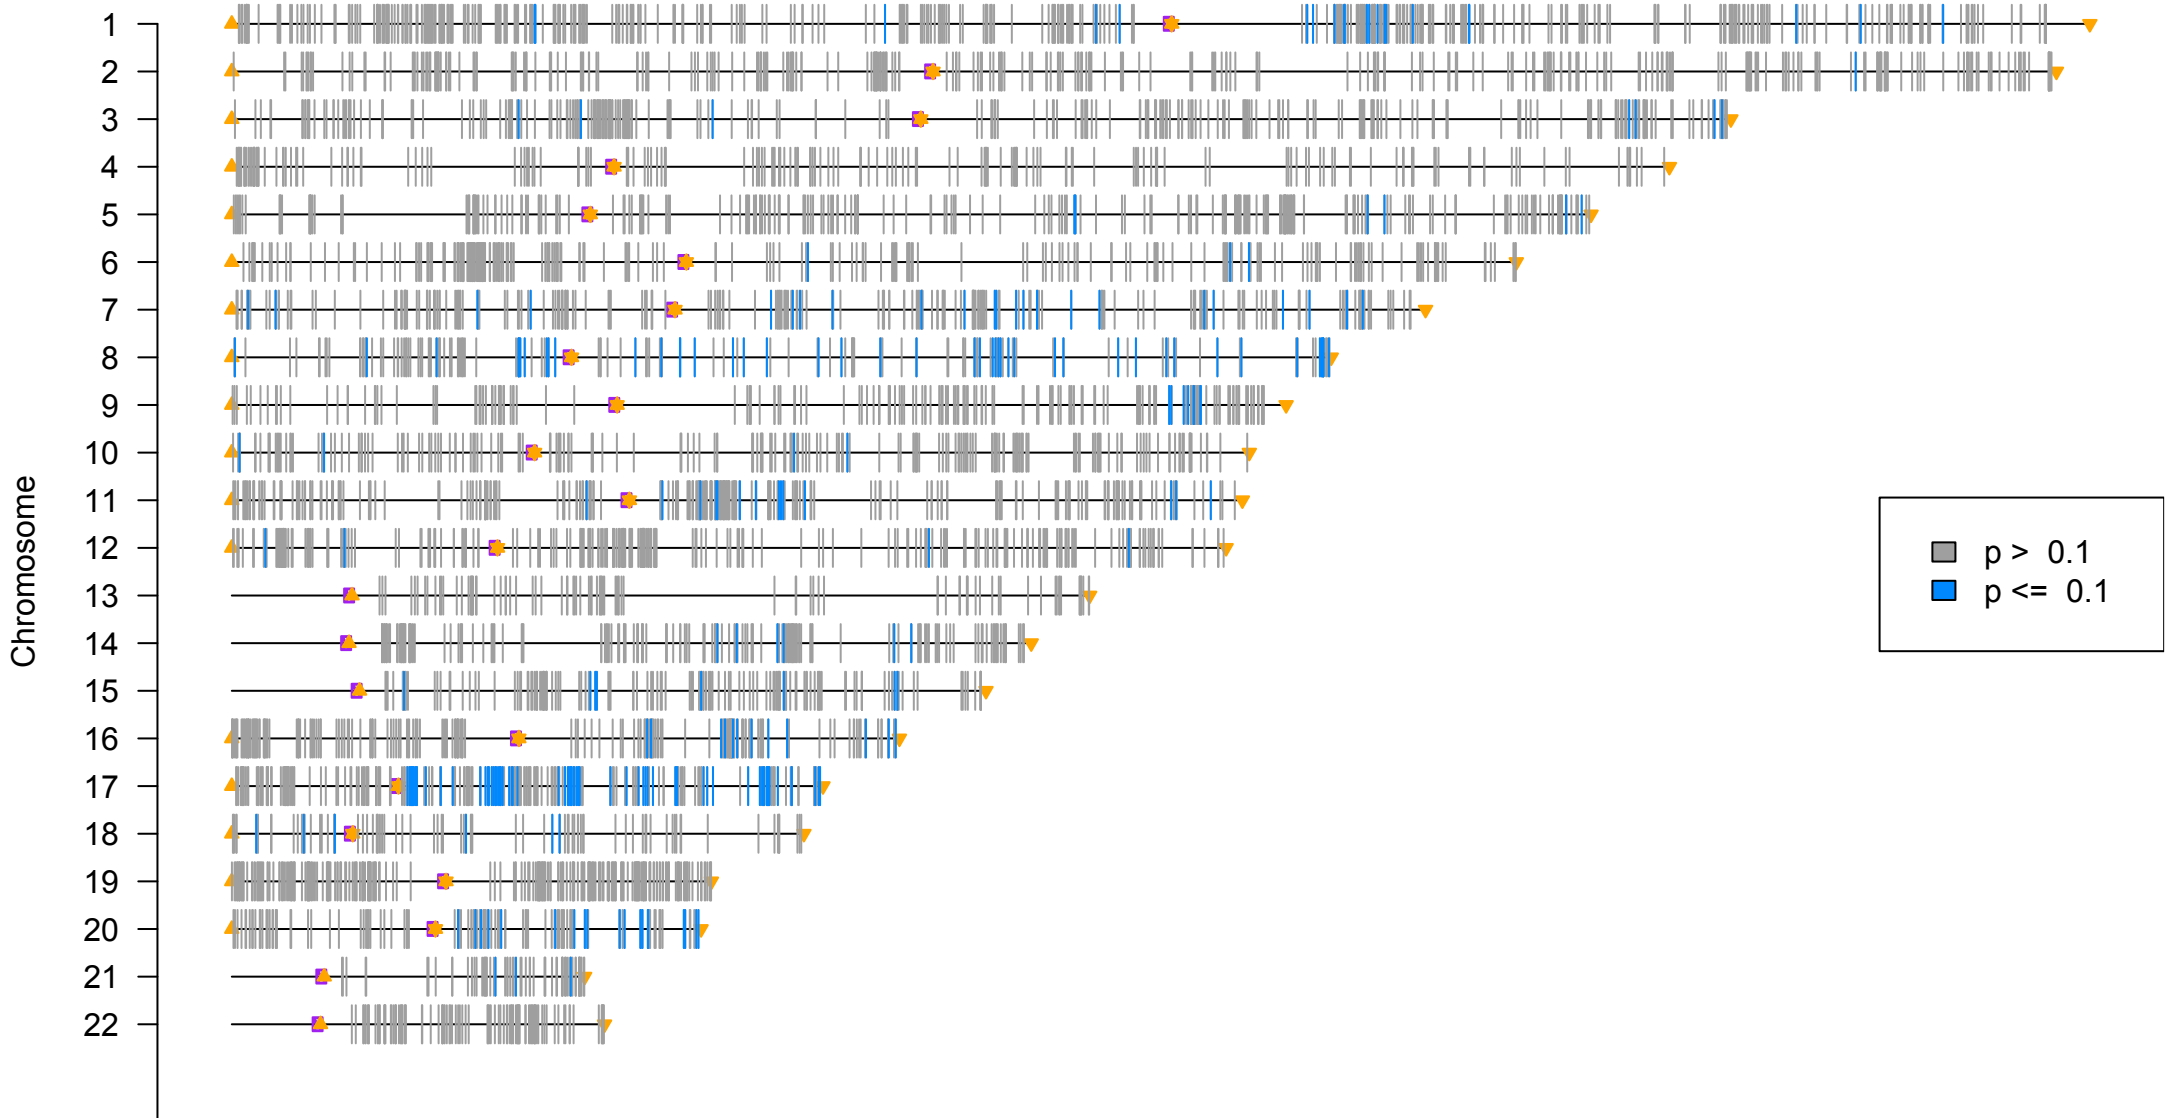

Supplement: 1471-2105-10-203-S1.pdf [file 1471-2105-10-203-S1.pdf]
