# Supplementary material for: Integrated analysis of DNA copy number and gene expression microarray data using gene sets
Source: PubMed Central journal article supplement (PMC2753845; doi:10.1186/1471-2105-10-203), 2009-06-29
Supplement: 1471-2105-10-203-S6.pdf [file 1471-2105-10-203-S6.pdf]

## Supplementary Tables

**Supplementary Table 1 - Number of gene expression probes associated with copy number in HapMap data. Significance threshold for uncorrected p-values was used as 0.001, for comparability with Stranger et al (2007).**

| Population | Gene-set model | Stranger | Overlap |
|------------|----------------|----------|---------|
| CEU        | 61             | 85       | 8       |
| CHB        | 48             | 44       | 6       |
| JPT        | 96             | 58       | 6       |
| YRI        | 112            | 96       | 8       |

## Supplementary Table 2 - Parameter values used in simulation

| Definition                  | Notation | Values |      |      |
|-----------------------------|----------|--------|------|------|
| Region length               | $I$      | 250    | 500  | 1000 |
| Sample size                 | $N$      | 25     | 50   | 100  |
| Proportion affected samples | $\pi$    | 0.10   | 0.25 | 0.50 |
